# Supplementary material
Source: PubMed Central journal article supplement (PMC3508296)
Supplement: NIHMS409143-supplement-Supp_Figure_S1-S4_Table_S1-S4.pdf [file NIHMS409143-supplement-Supp_Figure_S1-S4_Table_S1-S4.pdf]

# Supporting Information

## Vascular binding of a pathogen under shear force through mechanically distinct sequential interactions with host macromolecules

<sup>1,2</sup>Tara J. Moriarty\*, <sup>2</sup>Meiqing Shi<sup>^</sup>, <sup>3</sup>Yi-Pin Lin, <sup>1</sup>Rhodaba Ebady, <sup>4</sup>Hong Zhou<sup>#</sup>, <sup>1</sup>Tanya Odisho, <sup>2</sup>Pierre-Olivier Hardy, <sup>2</sup>Aydan Salman-Dilgimen, <sup>5</sup>Jing Wu<sup>†</sup>, <sup>5</sup>Eric H. Weening<sup>&</sup>, <sup>5</sup>Jon T. Skare, <sup>4</sup>Paul Kubes, <sup>3</sup>John Leong and <sup>2</sup>George Chaconas\*

<sup>1</sup>Matrix Dynamics Group, Faculty of Dentistry, and Department of Laboratory Medicine and Pathobiology, Faculty of Medicine, University of Toronto, ON M5S 3E2, Canada

<sup>2</sup>Snyder Institute for Chronic Diseases, Departments of Biochemistry & Molecular Biology and Microbiology and Infectious Diseases, University of Calgary, Calgary, AB T2N 4N1, Canada

<sup>3</sup>Department of Molecular Biology and Microbiology, Tufts University School of Medicine, Boston, MA 02114, USA

<sup>4</sup>Snyder Institute for Chronic Diseases, Department of Physiology and Pharmacology, University of Calgary, Calgary, AB T2N 4N1, Canada

<sup>5</sup>Department of Microbial and Molecular Pathogenesis, Texas A&M Health Science Center, Texas A&M University, Bryan, TX 77807, USA

---

<sup>^</sup>Current address: Veterinary Medicine, University of Maryland, College Park, MD 20742-3711, USA

<sup>#</sup> Current address: Department of Microbiology & Immunology, Nanjing Medical University, Nanjing, JS, P.R.China 210029

<sup>†</sup>Current address: Department of Veterinary Pathobiology, College of Veterinary Medicine, Texas A&M University, College Station, TX 77843, USA

<sup>&</sup>Current address: Department of Genetics, University of North Carolina at Chapel Hill, Chapel Hill, NC 27599, USA

---

\*Correspondence: [chaconas@ucalgary.ca](mailto:chaconas@ucalgary.ca); Phone 1-403-210-9692  
or [tara.moriarty@utoronto.ca](mailto:tara.moriarty@utoronto.ca); Phone 1-416-978-6685]

## SUPPLEMENTAL INFORMATION:

**Video Legends S1 and S2**

**Tables S1-S4**

**Figures S1-S4**

**Video S1: Spinning disk confocal IVM video footage of GFP-expressing infectious *B. burgdorferi* strain GCB966 (green) interacting with a postcapillary venule of the knee joint vasculature.** The vasculature is counterstained with fluorescent antibody to PECAM-1 (red). Elapsed time is shown at the top right and the scale is at the bottom left. The direction of blood flow is from bottom to top.

**Video S2: Spinning disk confocal IVM video footage of GFP-expressing infectious *B. burgdorferi* strain GCB966 (green) interacting with a postcapillary venule of the skin vasculature.** The vasculature is counterstained with Texas Red-labelled 70 kDa dextran (red). Elapsed time is shown at the top right and the scale at bottom left. Direction of blood flow is down and to the left.

**Table S1: *B. burgdorferi* strains used in this study**

| <b>Strain number</b>         | <b>Background</b>                        | <b>Description</b>                                                                                                                                                               | <b>Reference</b>                |
|------------------------------|------------------------------------------|----------------------------------------------------------------------------------------------------------------------------------------------------------------------------------|---------------------------------|
| GCB705                       | B31-A                                    | Non-infectious high passage strain transformed with GFP expression plasmid pTM61 (clone 1)                                                                                       | (Moriarty <i>et al.</i> , 2008) |
| GCB706                       | B31-A                                    | Non-infectious high passage strain transformed with GFP expression plasmid pTM61 (clone 2)                                                                                       | (Moriarty <i>et al.</i> , 2008) |
| GCB726                       | B31 5A4 NP1                              | Infectious strain transformed with GFP expression plasmid pTM61 (clone 2)                                                                                                        | (Moriarty <i>et al.</i> , 2008) |
| ML23/<br>pJW201<br>(GCB966)  | B31<br>derivative<br>ML23                | Parental ML23 strain (Seshu <i>et al.</i> , 2006) transformed with plasmid pJW201 ( <i>PflaB</i> -GFP/ <i>bbe22</i> ) (Wu <i>et al.</i> , 2011)                                  | (Wu <i>et al.</i> , 2011)       |
| JS315/<br>pJW201<br>(GCB971) | ML23<br>derivative<br><i>bbk32::strR</i> | ML23-derived <i>bbk32::strR bbk32</i> knockout strain (Seshu <i>et al.</i> , 2006) transformed with plasmid pJW201 ( <i>PflaB</i> -GFP/ <i>bbe22</i> ) (Wu <i>et al.</i> , 2011) | (Wu <i>et al.</i> , 2011)       |
| GCB1570                      | GCB706                                   | Non-infectious GFP-expressing high passage strain transformed with pTM242 and expressing RevA                                                                                    | This study                      |
| GCB1574                      | GCB706                                   | Non-infectious GFP-expressing high passage transformed with pTM244 and expressing BB0347                                                                                         | This study                      |
| GCB1586                      | GCB706                                   | Non-infectious GFP-expressing high passage strain transformed with pTM255 and expressing RevB                                                                                    | This study                      |
| GCB1585                      | GCB706                                   | Non-infectious GFP-expressing high passage strain transformed with pTM257 and expressing full-length BBK32                                                                       | This study                      |
| GCB1580                      | GCB706                                   | Non-infectious GFP-expressing high passage strain transformed with pTM246 and expressing BBK32 $\Delta$ 45-68                                                                    | This study                      |
| GCB1583                      | GCB706                                   | Non-infectious GFP-expressing high passage strain transformed with pTM248 and expressing BBK32 $\Delta$ 158-182                                                                  | This study                      |
| GCB1587                      | GCB706                                   | Non-infectious GFP-expressing high passage strain transformed with pTM243 and expressing RevA-FLAG                                                                               | This study                      |
| GCB1589                      | GCB706                                   | Non-infectious GFP-expressing high passage strain transformed with pTM256 and expressing RevB-FLAG                                                                               | This study                      |
| GCB1590                      | GCB706                                   | Non-infectious GFP-expressing high passage strain transformed with pTM245 and expressing BB0347-FLAG                                                                             | This study                      |

**Table S2: Constructs used in this study**

| <b>Plasmid</b> | <b><i>E. coli</i> strain</b> | <b>Description</b>                                                                                                                                                                                                                                                                                                                           | <b>Reference</b>        |
|----------------|------------------------------|----------------------------------------------------------------------------------------------------------------------------------------------------------------------------------------------------------------------------------------------------------------------------------------------------------------------------------------------|-------------------------|
| pTM61          | GCE1173                      | <b><i>P<sub>flaB</sub></i>-driven GFP expression</b><br>vector: pTM49 (modified pBSV2g)                                                                                                                                                                                                                                                      | (Moriarty et al., 2008) |
| pJW201         |                              | <b><i>bbe22/pncA</i> locus cloned into GFP expression plasmid</b><br>cassette cloned into pTM61 (Moriarty et al., 2008) via KpnI (Wu et al., 2011)                                                                                                                                                                                           | (Wu et al., 2011)       |
| pTM242         | GCE1865                      | <b><i>P<sub>flaB</sub></i>-driven RevA expression</b><br>cassette cloned into pCE320 (Eggers et al., 2002) via XhoI/NotI; <i>PflaB</i> sequence amplified from pTM61 (Moriarty et al., 2008); <i>revA</i> coding sequence amplified from B31 5A4 NP1                                                                                         | This study              |
| pTM244         | GCE1867                      | <b><i>P<sub>flaB</sub></i>-driven BB0347 expression</b><br>cassette cloned into pCE320 (Eggers et al., 2002) via XhoI/NotI; <i>PflaB</i> sequence amplified from pTM61 (Moriarty et al., 2008); <i>bb0347</i> coding sequence amplified from B31 5A4 NP1                                                                                     | This study              |
| pTM255         | GCE1878                      | <b><i>P<sub>flaB</sub></i>-driven RevB expression</b><br>cassette cloned into pCE320 (Eggers et al., 2002) via XhoI/NotI; <i>PflaB</i> sequence amplified from pTM61 (Moriarty et al., 2008); <i>revB</i> coding sequence amplified from B31 5A4                                                                                             | This study              |
| pTM257         | GCE1880                      | <b><i>P<sub>flaB</sub></i>-driven BBK32 WT expression</b><br>cassette cloned into pCE320 (Eggers et al., 2002) via XhoI/NotI; <i>PflaB</i> sequence amplified from pTM61 (Moriarty et al., 2008); <i>bbk32</i> coding sequence amplified from pBBK32 (Fischer et al., 2006)                                                                  | This study              |
| pTM248         | GCE1871                      | <b><i>P<sub>flaB</sub></i>-driven BBK32Δ158-182 expression</b><br>cassette cloned into pCE320 (Eggers et al., 2002) via XhoI/NotI; <i>PflaB</i> sequence amplified from pTM61 (Moriarty et al., 2008); <i>bbk32</i> Δ158-182 coding sequence amplified from pBBK32QC48 (Lin et al., 2012)                                                    | This study              |
| pTM246         | GCE1869                      | <b><i>P<sub>flaB</sub></i>-driven BBK32Δ45-68 expression</b><br>cassette cloned into pCE320 (Eggers et al., 2002) via XhoI/NotI; <i>PflaB</i> sequence amplified from pTM61 (Moriarty et al., 2008); <i>bbk32</i> Δ45-68 coding sequence amplified from pBBK32QC45 (Lin et al., 2012)                                                        | This study              |
| pTM243         | GCE1866                      | <b><i>P<sub>flaB</sub></i>-driven RevA-FLAG expression</b><br>cassette cloned into pCE320 (Eggers et al., 2002) via XhoI/NotI; <i>PflaB</i> sequence amplified from pTM61 (Moriarty et al., 2008); <i>revA</i> coding sequence amplified from B31 5A4 NP1; <i>3Xflag</i> coding sequence amplified from pJL148SPA (Zeghouf et al., 2004)     | This study              |
| pTM245         | GCE1868                      | <b><i>P<sub>flaB</sub></i>-driven BB0347-FLAG expression</b><br>cassette cloned into pCE320 (Eggers et al., 2002) via XhoI/NotI; <i>PflaB</i> sequence amplified from pTM61 (Moriarty et al., 2008); <i>bb0347</i> coding sequence amplified from B31 5A4 NP1; <i>3Xflag</i> coding sequence amplified from pJL148SPA (Zeghouf et al., 2004) | This study              |

### Constructs used in this study, *continued*

| <b>Plasmid</b> | <b><i>E. coli</i> strain</b>                | <b>Description</b>                                                                                                                                                                                                                                                                                                                    | <b>Reference</b>           |
|----------------|---------------------------------------------|---------------------------------------------------------------------------------------------------------------------------------------------------------------------------------------------------------------------------------------------------------------------------------------------------------------------------------------|----------------------------|
| pTM256         | GCE1879                                     | <b><i>P<sub>flaB</sub></i>-driven RevB-FLAG expression</b><br>cassette cloned into pCE320 (Eggers et al., 2002) via XhoI/NotI; <i>PflaB</i> sequence amplified from pTM61 (Moriarty et al., 2008); <i>revB</i> coding sequence amplified from B31 5A4; 3X <i>flag</i> coding sequence amplified from pJL148SPA (Zeghouf et al., 2004) | This study                 |
| pTM222         | GCE1845                                     | qPCR DNA quantification standard plasmid, containing <i>flaB</i> sequences                                                                                                                                                                                                                                                            | (Lee <i>et al.</i> , 2010) |
| pQC44          | pBBK32QC44 ( $\Delta$ 45-68)-DH5 $\alpha$   | pBBK32QC44 ( $\Delta$ 45-68)                                                                                                                                                                                                                                                                                                          | (Lin et al., 2012)         |
| pQC48          | pBBK32QC48 ( $\Delta$ 158-182)-DH5 $\alpha$ | pBBK32QC48 ( $\Delta$ 158-182)                                                                                                                                                                                                                                                                                                        | (Lin et al., 2012)         |
| pYL146         | pQE30-RevA-M15                              | pQE30-RevA: construct for recombinant expression of RevA                                                                                                                                                                                                                                                                              | This study                 |
| pYL147         | pQE30-RevB-M15                              | pQE30-RevB: construct for recombinant expression of RevB                                                                                                                                                                                                                                                                              | This study                 |
| pYL125         | pQE30-BB0347-M15                            | pQE30-BB0347: construct for recombinant expression of BB0347                                                                                                                                                                                                                                                                          | This study                 |
| pJF51          | pMal-c2-BBK32-BL21                          | pMal-c2-BBK32: construct for recombinant expression of MBP-BBK32                                                                                                                                                                                                                                                                      | (Fischer et al., 2006)     |

**Table S3: Primers used in this study**

| Primer | Target                                                                                                    | Sequence (5'-3')                                         |
|--------|-----------------------------------------------------------------------------------------------------------|----------------------------------------------------------|
| B1723  | 5' end of <i>PflaB</i> (with XhoI site) (forward primer)                                                  | <u>CTCGAGTGTCTGT</u> CGCCTCTTGTGG                        |
| B1662  | 3' end of <i>PflaB</i> fused to 5' end of <i>bbk32</i> coding sequence (reverse primer)                   | CAAATATTTACTTTTTAACTTTTTTCATTC<br>ATTCTCCATGATAAAAATTTAA |
| B1663  | 3' end of <i>PflaB</i> fused to 5' end of <i>bbk32</i> coding sequence (forward primer)                   | TTAAATTTTATCATGGAGGAATGAATGA<br>AAAAAGTTAAAAGTAAATATTTG  |
| B1725  | 3' end of <i>bbk32</i> coding sequence (with NotI site) (reverse primer)                                  | <u>GCGGCCGCTTAGT</u> ACCAAACGCCATTC<br>TTGTC             |
| B1736  | 3' end of <i>PflaB</i> fused to 5' end of <i>revA</i> coding sequence (forward primer)                    | TTAAATTTTATCATGGAGGAATGAATGA<br>GAAATAAAAACATATTTAAATTA  |
| B1737  | 3' end of <i>PflaB</i> fused to 5' end of <i>revA</i> coding sequence (reverse primer)                    | TAATTTAAATATGTTTTATTTCTCATTC<br>ATTCTCCATGATAAAAATTTAA   |
| B1747  | 3' end of <i>revA</i> coding sequence (with NotI site) (reverse primer)                                   | <u>GCGGCCGCTTAAT</u> TAGTCCCTCTTCG<br>AGGA               |
| B1738  | 3' end of <i>revA</i> coding sequence fused to 5' end of <i>3Xflag</i> coding sequence (forward primer)   | TCCTCGAAGAGGGCACTAATGACTACA<br>AAGACCATGACGG             |
| B1739  | 3' end of <i>revA</i> coding sequence fused to 5' end of <i>3Xflag</i> coding sequence (reverse primer)   | CCGTCATGGTCTTTGTAGTCATTAGTGC<br>CCTCTTCGAGGA             |
| B1724  | 3' end of <i>3Xflag</i> coding sequence (with NotI site) (reverse primer)                                 | GCGGCCGCCTACTTGTTCATCGTCATCC<br>TTGTA                    |
| B1728  | 3' end of <i>PflaB</i> fused to 5' end of <i>bb0347</i> coding sequence (forward primer)                  | TTAAATTTTATCATGGAGGAATGATTGA<br>TAAAATGTCTTTGAATTACA     |
| B1729  | 3' end of <i>PflaB</i> fused to 5' end of <i>bb0347</i> coding sequence (reverse primer)                  | TGTAATTCAAAGACATTTTTATCAATCAT<br>TCCTCCATGATAAAAATTTAA   |
| B1745  | 3' end of <i>bb0347</i> coding sequence (with NotI site) (reverse primer)                                 | <u>GCGGCCGCTTAGG</u> TTTGATTTTTTATTT<br>TTTTTATTA        |
| B1730  | 3' end of <i>bb0347</i> coding sequence fused to 5' end of <i>3Xflag</i> coding sequence (forward primer) | CTAATAAAAAAATAAAAAATCAAACCG<br>ACTACAAAGACCATGACGG       |
| B1731  | 3' end of <i>bb0347</i> coding sequence fused to 5' end of <i>3Xflag</i> coding sequence (reverse primer) | CCGTCATGGTCTTTGTAGTCGGTTTGAT<br>TTTTTATTTTTTTTATTAG      |
| B1732  | 3' end of <i>PflaB</i> fused to 5' end of <i>revB</i> coding sequence (forward primer)                    | TTAAATTTTATCATGGAGGAATGAATGC<br>AAAAAATAAACATAGCTAAAT    |
| B1733  | 3' end of <i>PflaB</i> fused to 5' end of <i>revB</i> coding sequence (reverse primer)                    | ATTTAGCTATGTTTTATTTTTTGCATTCAT<br>TCCTCCATGATAAAAATTTAA  |
| B1799  | 3' end of <i>revB</i> coding sequence (with NotI site) (reverse primer)                                   | <u>GCGGCCGCTTAAT</u> CTTCTTCAAGATATT<br>TTATTATACTG      |
| B1735  | 3' end of <i>revB</i> coding sequence fused to 5' end of <i>3Xflag</i> coding sequence (forward primer)   | CCGTCATGGTCTTTGTAGTCATCTTCTT<br>CAAGATATTTTATTATAC       |
| B1734  | 3' end of <i>revB</i> coding sequence fused to 5' end of <i>3Xflag</i> coding sequence (reverse primer)   | GTATAATAAAATATCTTGAAGAAGATGA<br>CTACAAAGACCATGACGG       |
| B1703  | Forward primer used for sequencing and screening of pCE320-based constructs                               | GCTATGACCATGATTACGCC                                     |
| B1704  | Reverse primer used for sequencing and screening of pCE320-based constructs                               | GGGTTTTCCAGTCACGAC                                       |

**Primers used in this study, *continued***

| <b>Primer</b>      | <b>Target</b>                                                                                           | <b>Sequence (5'-3')</b>              |
|--------------------|---------------------------------------------------------------------------------------------------------|--------------------------------------|
| B70                | Forward primer used for PCR screening of pCE320-based constructs (amplifies <i>kan</i> resistance gene) | CATATGAGCCATATTCAACGGGAAACG          |
| B71                | Reverse primer used for PCR screening of pCE320-based constructs (amplifies <i>kan</i> resistance gene) | AAAGCCGTTTCTGTAATGAAGGAG             |
| B1672              | Forward primer for qPCR amplification of <i>flaB</i> DNA                                                | GCAGCTAATGTTGCAAATCTTTTC             |
| B1673              | Reverse primer for qPCR amplification of <i>flaB</i> DNA                                                | GCAGGTGCTGGCTGTTGA                   |
| RevAfp/<br>pQE30   | Forward primer used for cloning <i>revA</i> coding sequence into pQE30                                  | <u>CGGGATCC</u> TGTAAAGCATATGTAGAA   |
| RevArp/<br>pQE30   | Reverse primer used for cloning <i>revA</i> coding sequence into pQE30                                  | <u>CGGTCTGACT</u> TAAATTAGTGCCCTCTTC |
| RevBfp/<br>pQE30   | Forward primer used for cloning <i>revB</i> coding sequence into pQE30                                  | <u>CGGGATCC</u> GAACTATTTATAATAAAA   |
| RevBrp/<br>pQE30   | Reverse primer used for cloning <i>revB</i> coding sequence into pQE30                                  | <u>CGGTCTGACT</u> TAAATCTTCTTCAAGATA |
| BB0347fp/<br>pQE30 | Forward primer used for cloning <i>bb0347</i> coding sequence into pQE30                                | <u>CGGGATCC</u> TCTTTGAATTACACTGAA   |
| BB0347rp/<br>pQE30 | Reverse primer used for cloning <i>bb0347</i> coding sequence into pQE30                                | <u>CGGTCTGACT</u> TAGGTTTGATTTTTAT   |

**Table S4: Detailed statistical data (all figures)**

| <b>Fig</b> | <b>Comparison</b>                                          | <b>P-value</b>    |
|------------|------------------------------------------------------------|-------------------|
| <b>2B</b>  | <b>ANOVA</b>                                               | <b>&lt;0.0001</b> |
|            | <u>Pairwise comparisons (t-test):</u>                      |                   |
|            | Infectious vs <i>bbk32</i> KO                              | 0.1837            |
|            | Infectious vs non-infectious                               | <0.0001           |
| <b>2C</b>  | <b>ANOVA</b>                                               | <b>0.0006</b>     |
|            | <u>Pairwise comparisons (t-test):</u>                      |                   |
|            | Infectious – FN-C/H II vs <i>bbk32</i> KO - FN-C/H II      | 0.0184            |
|            | Infectious – FN-C/H II vs infectious + FN-C/H II           | 0.0151            |
|            | Infectious – FN-C/H II vs <i>bbk32</i> KO + FN-C/H II      | 0.0102            |
|            | <i>bbk32</i> KO – FN-C/H II vs infectious + FN-C/H II      | 0.7611            |
|            | <i>bbk32</i> KO – FN-C/H II vs <i>bbk32</i> KO + FN-C/H II | 0.5408            |
|            | Infectious + FN-C/H II vs <i>bbk32</i> KO + FN-C/H II      | 0.8202            |
| <b>3C</b>  | <b>ANOVA</b>                                               | <b>0.0076</b>     |
|            | <u>Pairwise comparisons (t-test):</u>                      |                   |
|            | BBK32 WT vs RevA                                           | 0.0331            |
|            | BBK32 WT vs BB0347                                         | 0.0758            |
|            | BBK32 WT vs RevB                                           | 0.0155            |
|            | BBK32 WT vs non-infectious                                 | 0.0064            |
|            | RevA vs non-infectious                                     | 0.1689            |
|            | BB0347 vs non-infectious                                   | 0.2525            |
| <b>4C</b>  | <b>ANOVA</b>                                               | <b>0.0033</b>     |
|            | <u>Pairwise comparisons (t-test):</u>                      |                   |
|            | BBK32 WT vs BBK32 $\Delta$ 45-68                           | 0.9233            |
|            | BBK32 WT vs BBK32 $\Delta$ 158-182                         | 0.1046            |
|            | BBK32 WT vs non-infectious                                 | 0.0154            |
|            | BBK32 $\Delta$ 45-68 vs BBK32 $\Delta$ 158-182             | 0.0529            |
|            | BBK32 $\Delta$ 45-68 vs non-infectious                     | 0.0005            |
|            | BBK32 $\Delta$ 158-182 vs non-infectious                   | 0.2850            |
| <b>4D</b>  | <b>ANOVA</b>                                               | <b>0.0021</b>     |
|            | <u>Pairwise comparisons (t-test):</u>                      |                   |
|            | BBK32 WT vs BBK32 $\Delta$ 45-68                           | 0.1664            |
|            | BBK32 WT vs BBK32 $\Delta$ 158-182                         | 0.2131            |
|            | BBK32 WT vs non-infectious                                 | 0.0673            |
|            | BBK32 $\Delta$ 45-68 vs BBK32 $\Delta$ 158-182             | 0.7220            |
|            | BBK32 $\Delta$ 45-68 vs non-infectious                     | 0.0866            |
| <b>4E</b>  | <b>ANOVA</b>                                               | <b>0.0103</b>     |
|            | <u>Pairwise comparisons (t-test):</u>                      |                   |
|            | BBK32 WT vs BBK32 $\Delta$ 45-68                           | 0.0734            |
|            | BBK32 WT vs BBK32 $\Delta$ 158-182                         | 0.2937            |
|            | BBK32 WT vs non-infectious                                 | 0.0622            |
|            | BBK32 $\Delta$ 45-68 vs BBK32 $\Delta$ 158-182             | 0.0048            |
|            | BBK32 $\Delta$ 45-68 vs non-infectious                     | 0.8095            |
| <b>S2A</b> | <b>ANOVA</b>                                               | <b>0.1613</b>     |
|            | <u>Pairwise comparisons (t-test):</u>                      |                   |
|            | Infectious vs BBK32 WT                                     | 0.8698            |
|            | Infectious vs RevA                                         | 0.2624            |



**Table S4: Detailed statistical data, *continued***

| <b>Fig</b>                               | <b>Comparison</b>                              | <b>P-value</b>    |
|------------------------------------------|------------------------------------------------|-------------------|
| <b>S2A</b>                               | <u>Pairwise comparisons (t-test):</u>          |                   |
|                                          | Infectious vs BB0347                           | 0.2709            |
|                                          | Infectious vs RevB                             | 0.4945            |
|                                          | Infectious vs non-infectious                   | 0.1889            |
|                                          | BBK32 WT vs RevA                               | 0.2574            |
|                                          | BBK32 WT vs BB0347                             | 0.3209            |
|                                          | BBK32 WT vs RevB                               | 0.5440            |
|                                          | BBK32 WT vs non-infectious                     | 0.1929            |
|                                          | RevA vs non-infectious                         | 0.3899            |
|                                          | BB0347 vs non-infectious                       | 0.3298            |
| RevB vs non-infectious                   | 0.2595                                         |                   |
| <b>S2B</b>                               | <b>ANOVA</b>                                   | <b>&lt;0.0001</b> |
|                                          | <u>Pairwise comparisons (t-test):</u>          |                   |
|                                          | Infectious vs BBK32 WT                         | 0.6163            |
|                                          | Infectious vs RevA                             | 0.0019            |
|                                          | Infectious vs BB0347                           | 0.0011            |
|                                          | Infectious vs RevB                             | 0.0021            |
|                                          | Infectious vs non-infectious                   | 0.0006            |
|                                          | BBK32 WT vs RevA                               | 0.0116            |
|                                          | BBK32 WT vs BB0347                             | 0.0090            |
|                                          | BBK32 WT vs RevB                               | 0.0129            |
|                                          | BBK32 WT vs non-infectious                     | 0.0068            |
|                                          | RevA vs non-infectious                         | 0.4179            |
|                                          | BB0347 vs non-infectious                       | 0.5258            |
|                                          | RevB vs non-infectious                         | 0.2397            |
| <b>S2C</b>                               | <b>ANOVA</b>                                   | <b>&lt;0.0001</b> |
|                                          | <u>Pairwise comparisons (t-test):</u>          |                   |
|                                          | Infectious vs BBK32 WT                         | 0.5695            |
|                                          | Infectious vs RevA                             | <0.0001           |
|                                          | Infectious vs BB0347                           | <0.0001           |
|                                          | Infectious vs RevB                             | 0.0003            |
|                                          | Infectious vs non-infectious                   | <0.0001           |
|                                          | BBK32 WT vs RevA                               | 0.0027            |
|                                          | BBK32 WT vs BB0347                             | 0.0017            |
|                                          | BBK32 WT vs RevB                               | 0.0109            |
|                                          | BBK32 WT vs non-infectious                     | 0.0017            |
|                                          | RevA vs non-infectious                         | 0.5541            |
|                                          | BB0347 vs non-infectious                       | 0.9893            |
|                                          | RevB vs non-infectious                         | 0.0302            |
| <b>S3A</b>                               | <b>ANOVA</b>                                   | <b>0.0003</b>     |
|                                          | <u>Pairwise comparisons (t-test):</u>          |                   |
|                                          | Infectious vs BBK32 WT                         | 0.8767            |
|                                          | Infectious vs BBK32 $\Delta$ 45-68             | 0.6691            |
|                                          | Infectious vs BBK32 $\Delta$ 158-182           | 0.8917            |
|                                          | Infectious vs non-infectious                   | 0.0436            |
|                                          | BBK32 WT vs BBK32 $\Delta$ 45-68               | 0.7206            |
|                                          | BBK32 WT vs BBK32 $\Delta$ 158-182             | 0.7429            |
|                                          | BBK32 WT vs non-infectious                     | 0.0082            |
|                                          | BBK32 $\Delta$ 45-68 vs BBK32 $\Delta$ 158-182 | 0.5260            |
| BBK32 $\Delta$ 45-68 vs non-infectious   | <0.0001                                        |                   |
| BBK32 $\Delta$ 158-182 vs non-infectious | 0.0261                                         |                   |

**Table S4: Detailed statistical data, *continued***

| <b>Fig</b>                               | <b>Comparison</b>                              | <b>P-value</b>    |
|------------------------------------------|------------------------------------------------|-------------------|
| <b>S3B</b>                               | <b>ANOVA</b>                                   | <b>&lt;0.0001</b> |
|                                          | <u>Pairwise comparisons (t-test):</u>          |                   |
|                                          | Infectious vs BBK32 WT                         | 0.4666            |
|                                          | Infectious vs BBK32 $\Delta$ 45-68             | 0.0186            |
|                                          | Infectious vs BBK32 $\Delta$ 158-182           | 0.2226            |
|                                          | Infectious vs non-infectious                   | 0.0015            |
|                                          | BBK32 WT vs BBK32 $\Delta$ 45-68               | 0.0117            |
|                                          | BBK32 WT vs BBK32 $\Delta$ 158-182             | 0.6090            |
|                                          | BBK32 WT vs non-infectious                     | 0.0020            |
|                                          | BBK32 $\Delta$ 45-68 vs BBK32 $\Delta$ 158-182 | 0.0122            |
|                                          | BBK32 $\Delta$ 45-68 vs non-infectious         | 0.0323            |
| BBK32 $\Delta$ 158-182 vs non-infectious | 0.0035                                         |                   |
| <b>S3C</b>                               | <b>ANOVA</b>                                   | <b>0.1363</b>     |
|                                          | <u>Pairwise comparisons (t-test):</u>          |                   |
|                                          | Infectious vs BBK32 WT                         | 0.8728            |
|                                          | Infectious vs BBK32 $\Delta$ 45-68             | 0.2066            |
|                                          | Infectious vs BBK32 $\Delta$ 158-182           | 0.6678            |
|                                          | Infectious vs non-infectious                   | 0.1889            |
|                                          | BBK32 WT vs BBK32 $\Delta$ 45-68               | 0.2116            |
|                                          | BBK32 WT vs BBK32 $\Delta$ 158-182             | 0.7248            |
|                                          | BBK32 WT vs non-infectious                     | 0.1948            |
|                                          | BBK32 $\Delta$ 45-68 vs BBK32 $\Delta$ 158-182 | 0.3581            |
|                                          | BBK32 $\Delta$ 45-68 vs non-infectious         | 0.3479            |
| BBK32 $\Delta$ 158-182 vs non-infectious | 0.3463                                         |                   |

## Supplemental References

- Eggers, C. H., M. J. Caimano, M. L. Clawson, W. G. Miller, D. S. Samuels & J. D. Radolf, (2002) Identification of loci critical for replication and compatibility of a *Borrelia burgdorferi* cp32-based shuttle vector for the expression of fluorescent reporters in the Lyme disease spirochete. *Molecular microbiology* **43**: 281-295.
- Fischer, J. R., K. T. Leblanc & J. M. Leong, (2006) Fibronectin binding protein BBK32 of the Lyme disease spirochete promotes bacterial attachment to glycosaminoglycans. *Infection and immunity* **74**: 435-441.
- Lee, W. Y., T. J. Moriarty, C. H. Wong, H. Zhou, R. M. Strieter, N. van Rooijen, G. Chaconas & P. Kubes, (2010) An intravascular immune response to *Borrelia burgdorferi* involves Kupffer cells and iNKT cells. *Nature immunology* **11**: 295-302.
- Lin, Y.-P., Q. Chen, N. P. Dufour, J. R. Fischer & J. M. Leong, (2012) *Borrelia burgdorferi* BBK32 is a bifunctional adhesin with glycosaminoglycan- and fibronectin-binding activities that each confer binding to distinct mammalian cell types. *Manuscript in preparation*.
- Moriarty, T. J., M. U. Norman, P. Colarusso, T. Bankhead, P. Kubes & G. Chaconas, (2008) Real-time high resolution 3D imaging of the Lyme disease spirochete adhering to and escaping from the vasculature of a living host. *PLoS pathogens* **4**: e1000090.
- Seshu, J., M. D. Esteve-Gassent, M. Labandeira-Rey, J. H. Kim, J. P. Trzeciakowski, M. Hook & J. T. Skare, (2006) Inactivation of the fibronectin-binding adhesin gene *bbk32* significantly attenuates the infectivity potential of *Borrelia burgdorferi*. *Molecular microbiology* **59**: 1591-1601.
- Wu, J., E. H. Weening, J. B. Faske, M. Hook & J. T. Skare, (2011) Invasion of eukaryotic cells by *Borrelia burgdorferi* requires  $\alpha$ 1 integrins and Src kinase activity. *Infection and immunity* **79**: 1338-1348.
- Zeghouf, M., J. Li, G. Butland, A. Borkowska, V. Canadien, D. Richards, B. Beattie, A. Emili & J. F. Greenblatt, (2004) Sequential Peptide Affinity (SPA) system for the identification of mammalian and bacterial protein complexes. *J Proteome Res* **3**: 463-468.

## Figure S1

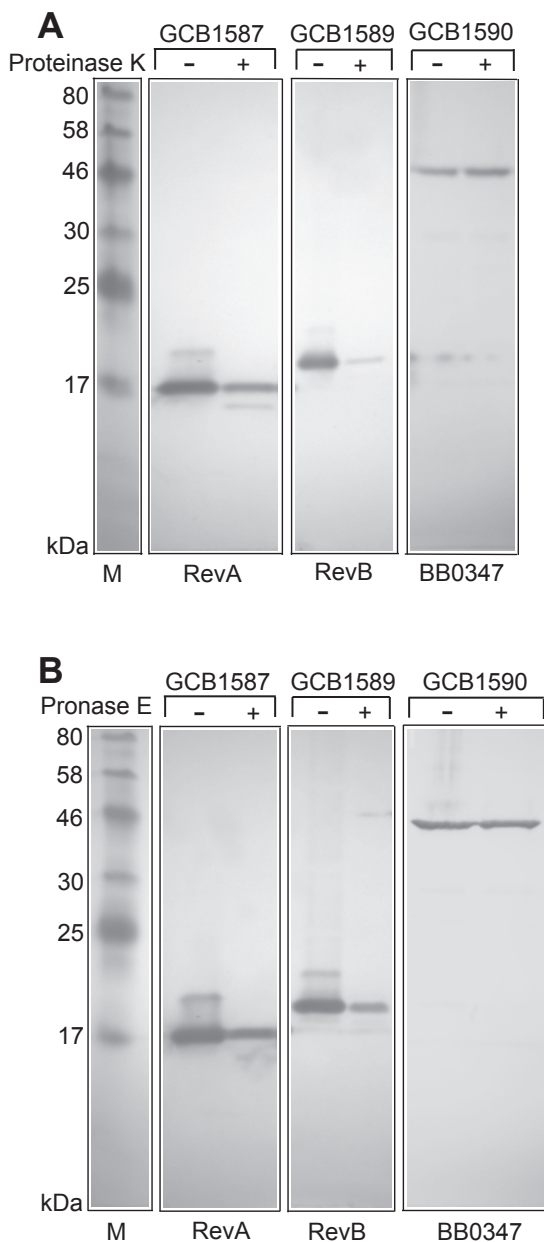

**Figure S1: Adhesin expression and localization in gain of function strains.** *B. burgdorferi* (pellets from  $5 \times 10^7$  -  $1 \times 10^8$  spirochetes) in 100  $\mu$ l were incubated in the absence or presence of proteinase K (**A**) or pronase (**B**) as previously described (Probert & Johnson, 1998, Fischer et al., 2006, Norman *et al.*, 2008). The concentration of proteinase K used in the gel shown was 400  $\mu$ g/ml for all proteins and the concentration of pronase used was 600  $\mu$ g/ml for RevA and RevB and 2 mg/ml for BB0347. For RevA (19 kDa) and RevB (21 kDa),  $1.25 \times 10^7$  lysed bacteria were loaded per lane. For BB0347 (56 kDa)  $5 \times 10^7$  lysed spirochetes were loaded.

**Figure S2**

**A**

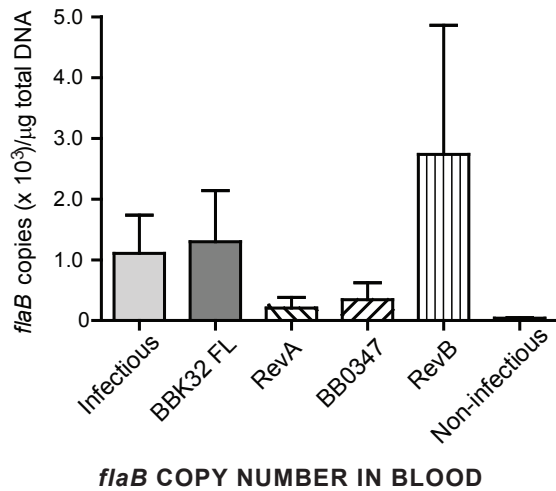

**B**

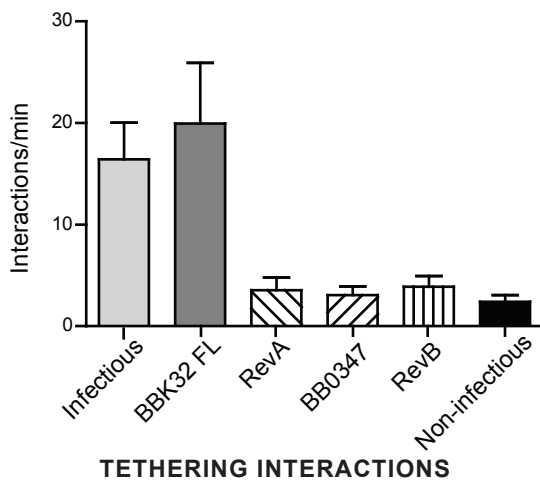

**C**

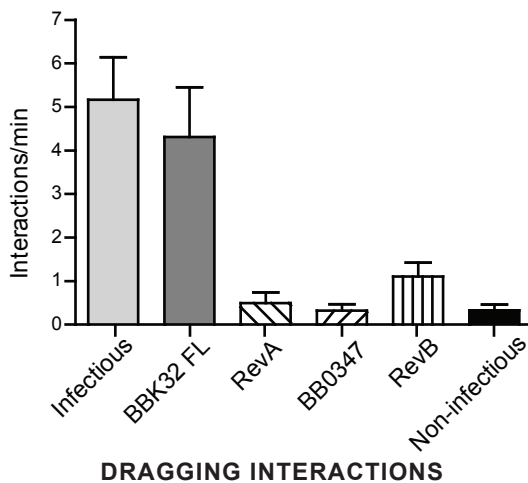

**Figure S2: Role of BBK32 and other *B. burgdorferi* Fn-binding proteins in microvascular interactions *in vivo* and in evasion of intravascular immune clearance.**

Unadjusted data from the experiments presented in **Fig. 3B. A)** Relative numbers of circulating bacteria for four fluorescent *B. burgdorferi* gain-of-function strains expressing full-length BBK32 (BBK32 FL), RevA, BB0347 or RevB, and infectious and non-infectious controls. **Strains:** 1) GCB726: infectious B31 5A4 NP1 control (infectious), 2) GCB1585: non-infectious expressing full-length BBK32 *in trans* (BBK32 FL), 3) GCB1570: non-infectious expressing RevA *in trans* (RevA), 4) GCB1574: non-infectious expressing BB0347 *in trans* (BB0347), 5) GCB1586: non-infectious expressing RevB *in trans*, and 6) GCB706: non-infectious parent, B31-A. Spirochete burden in blood was measured by qPCR amplification of *flaB* sequences, and *flaB* copy number was normalized to total number of µg of DNA isolated from each blood sample. Blood samples were collected from the same mice where microvascular interactions had previously been examined by intravital microscopy, an average of 1 hour following intravenous inoculation (see **Panels B-C** below). N=4 mice inoculated with infectious *B. burgdorferi*; n=6 BBK32 FL; n=6 RevA; n=5 BB0347; n=6 RevB; n=4 non-infectious. Means and standard error bars are indicated for each experimental group. **B-C)** Microvascular interaction rates (**B**: tethering interactions; **C** dragging interactions) for *B. burgdorferi* gain-of-function strains expressing full-length BBK32 (BBK32 FL; strain GCB1585), RevA (strain GCB1570), BB0347 (strain GCB1574) or RevB (strain GCB1586), and infectious and non-infectious controls (strains GCB726 and GCB706, respectively), as analyzed by high acquisition rate spinning disk confocal intravital microscopy. Statistical testing for

**Figure S3**

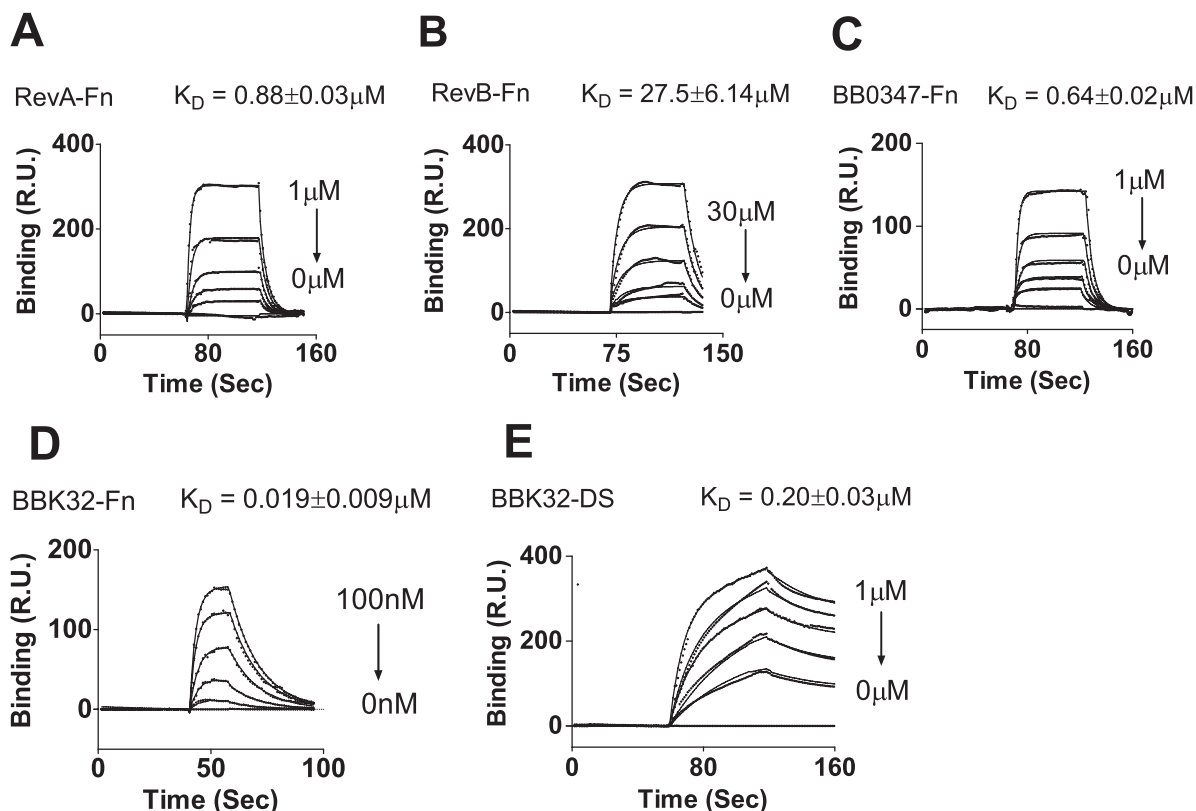

**Figure S3: Quantitative surface plasmon resonance (SPR) analysis of BBK32, RevA, RevB and BB0347 interactions with Fn and dermatan sulfate.**

For SPR analysis of Fn binding, 1  $\mu\text{g}$  of Fn was immobilized on the surface of a CM5 chip. A range of concentrations of **(A)** RevA (0, 0.0625, 0.125, 0.25, 0.5, 1  $\mu\text{M}$ ), of **(B)** RevB (0, 1.875, 3.75, 7.5, 15, 30  $\mu\text{M}$ ), of **(C)** BB0347 (0, 0.0625, 0.125, 0.25, 0.5, 1  $\mu\text{M}$ ), or of **(D)** BBK32 (0, 6.25, 12.5, 25, 50, 100 nM) in PBS buffer at pH 7.5 were passed over the chip. **(E)** To measure the affinity of BBK32 for dermatan sulfate (DS), 1  $\mu\text{g}$  of biotinylated DS was immobilized on the surface of an SA chip. Various concentrations of BBK32 (0, 0.0625, 0.125, 0.25, 0.5, 1  $\mu\text{M}$ ) in PBS buffer at pH 7.5 were circulated over the chip. The  $K_D$ ,  $K_{on}$  and  $K_{off}$  were obtained from the average of triplicate experiments and are shown in **Table 1**.

**Figure S4**

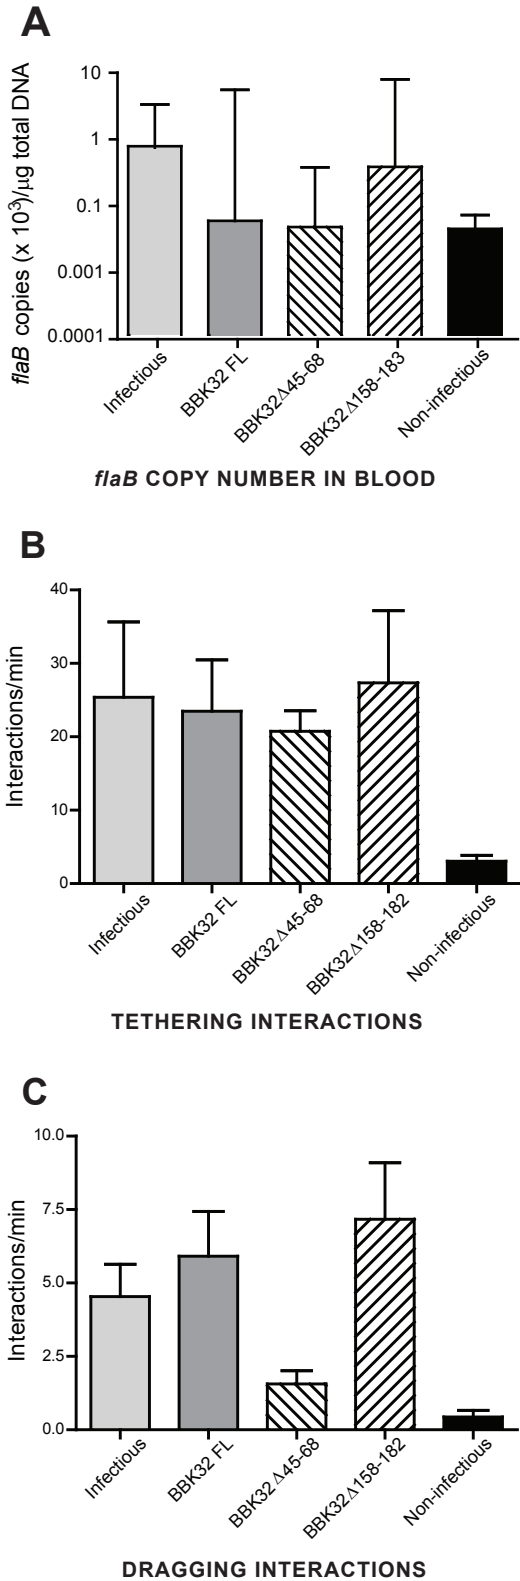

**Figure S4: Unadjusted data for the microvascular interaction experiments presented in Fig. 5. A)** Relative numbers of circulating bacteria for the experiment shown in **Fig. 5. B)** Tethering interaction rates. **C)** Dragging interaction rates. The data shown is without normalization to *flaB* copy number. Spirochete burden in blood was measured by qPCR amplification of *flaB* sequences, and *flaB* copy number was normalized to total number of  $\mu\text{g}$  of DNA isolated from each blood sample. Blood samples were collected from the same mice where microvascular interactions had previously been examined by intravital microscopy, an average of 1 hour following intravenous inoculation (see **Fig. 5**). Means and standard error bars are indicated for each experimental group in panels **A** and **B**. Panel **C** shows medians and ranges for each experimental group. Statistical testing for significant differences among all experimental groups was performed using a non-parametric Kruskal-Wallis ANOVA (P values of 0.0.0003, <0.0001 and 0.1363 for **A**, **B** and **C**, respectively). All statistical data may be found in **Table S4**.
